# Supplementary material
Source: publisher figshare collection journal article supplement (https://sage.figshare.com/ndownloader/files/28111723)
Supplement: Supplementary file 1 [file 28111723]

DMS1	DMS2	DMS3	DMS4	DMS5	PROC1	PROC2	PROC3	PROC4	PROC5	RM1	RM2	RM3	RM4	RM5	SI1	SI2	SI3	PI1	PI2	PI3	OI1	OI2	OI3	OP1	OP2	OP3	OP4	OP5
4	4	4	3	3	5	4	4	4	4	4	4	4	4	3	5	5	3	4	4	4	5	5	5	5	5	5	5	4
4	3	4	4	4	5	5	4	4	3	5	4	4	4	3	4	4	4	4	4	4	5	5	4	5	4	4	4	3
4	4	3	4	4	5	4	4	4	4	5	4	4	4	3	4	4	4	4	4	4	6	5	5	5	5	4	4	3
4	3	4	3	4	5	4	4	4	3	4	5	4	4	3	5	5	4	6	6	4	6	5	4	6	4	5	5	4
4	4	3	4	4	5	5	5	4	3	4	5	4	4	3	4	4	5	5	4	4	6	5	5	5	5	4	4	3
4	3	3	3	4	5	5	4	4	4	5	5	4	3	3	5	4	4	4	4	4	6	5	5	5	5	5	4	3
4	4	3	4	4	5	5	5	4	4	5	5	4	4	4	4	5	4	4	4	4	6	5	5	5	5	4	5	3
4	3	4	3	4	5	5	4	4	3	4	3	3	4	3	4	5	4	4	4	4	6	5	5	5	5	5	5	4
4	4	4	4	3	5	5	5	5	5	5	5	4	3	3	5	4	3	4	4	4	6	5	4	5	4	5	4	3
4	4	3	4	3	5	5	4	4	3	4	3	3	3	2	4	4	4	4	4	4	5	4	4	4	4	4	4	3
3	4	4	3	4	5	5	5	4	3	4	3	3	3	3	4	4	5	4	3	3	3	3	3	4	5	4	4	4
4	3	3	4	4	5	4	4	3	3	5	5	3	4	3	4	4	4	4	4	4	5	4	4	4	4	5	4	4
3	3	3	3	4	5	4	4	4	4	5	5	4	4	3	2	2	2	4	4	4	4	4	4	4	4	4	4	4
4	3	3	3	4	5	5	4	4	3	4	4	3	3	2	4	4	5	4	3	3	3	3	3	5	5	4	3	3
4	4	3	3	3	5	5	5	5	4	5	4	4	3	2	4	4	5	4	4	4	5	5	5	6	5	4	4	4
4	3	4	4	4	5	4	5	4	3	5	4	3	4	4	2	2	2	4	4	4	5	5	5	5	4	3	4	4
3	4	4	4	4	5	4	4	4	4	4	3	3	3	3	4	4	4	4	4	4	5	5	4	5	3	3	4	4
4	4	3	3	4	5	4	4	4	3	5	5	4	4	3	3	3	3	4	4	3	5	5	4	4	4	3	4	3
4	3	4	4	4	5	4	5	4	3	5	5	3	4	3	4	4	3	4	4	4	5	5	5	4	3	3	4	3
4	2	4	3	3	5	5	4	4	4	5	5	4	4	4	4	3	4	4	4	4	4	5	5	5	4	4	4	4
2	2	3	3	4	5	5	4	4	3	5	5	4	4	3	4	3	3	4	4	3	5	4	3	5	4	4	3	2
4	3	4	3	3	5	5	3	3	3	5	5	3	3	3	5	4	3	4	4	3	5	4	3	5	3	3	3	3
3	2	3	2	3	5	5	3	3	3	5	5	3	3	3	3	3	2	4	4	3	5	4	4	5	3	3	3	3
3	3	2	3	3	4	5	4	3	3	5	5	4	3	3	4	3	3	4	4	3	4	4	4	5	4	3	3	3
3	2	3	3	4	5	4	3	3	4	5	4	4	4	4	3	4	3	3	3	3	4	3	3	4	4	4	4	3
4	3	3	2	4	5	4	3	2	3	5	4	3	3	3	3	3	2	3	3	3	4	3	3	4	3	3	3	3
4	3	2	3	4	5	4	3	3	4	5	4	3	3	4	4	4	3	4	4	3	5	4	4	4	3	3	4	3
3	3	3	3	2	5	4	5	3	4	5	4	5	4	4	3	3	4	3	3	3	5	5	5	4	5	4	4	3
4	3	3	3	4	5	5	5	4	4	5	5	5	4	4	3	2	3	4	4	3	4	4	4	6	5	4	4	3
1	3	3	3	3	5	1	1	1	1	5	5	4	4	4	4	3	3	4	4	3	4	4	4	5	4	4	4	3
3	4	3	3	4	5	5	3	3	3	4	5	3	4	5	3	4	5	4	4	4	5	5	3	5	4	4	5	3
4	3	2	3	3	5	4	4	3	4	3	4	2	3	3	3	4	4	4	4	3	5	4	4	5	4	4	4	3
3	3	3	4	4	5	4	4	3	4	3	4	3	4	3	2	3	4	4	4	4	5	4	4	5	4	4	4	3
3	2	2	3	3	4	5	4	5	4	4	5	3	3	4	3	3	5	4	4	3	4	4	3	4	3	3	3	2
4	4	3	3	3	5	4	4	3	3	3	4	3	3	4	3	4	3	4	4	3	4	4	4	4	4	4	4	3
4	4	3	3	3	5	5	4	3	4	3	4	3	3	2	3	2	2	4	4	3	5	4	4	4	3	4	4	3
4	3	2	3	3	5	4	4	4	4	3	4	4	3	2	3	3	3	4	4	3	5	4	4	5	4	3	2	4
4	3	3	2	3	5	5	3	3	4	3	4	3	4	3	4	4	2	4	3	3	5	4	3	4	4	4	4	3
4	4	3	3	3	5	4	4	4	3	3	2	2	3	2	3	3	4	4	4	3	5	4	4	5	3	3	3	3
4	3	4	3	4	5	4	4	3	3	4	5	3	4	3	3	3	3	4	4	4	5	4	4	4	5	4	3	4
4	4	3	4	4	4	3	3	2	2	4	3	3	3	2	3	2	2	4	3	3	4	3	3	4	4	4	3	2
3	3	3	4	3	4	3	2	3	2	3	2	2	2	2	3	4	4	4	3	3	4	3	2	4	4	3	3	3
3	3	3	3	3	4	3	4	3	3	4	3	3	3	2	3	5	2	3	3	3	2	2	2	4	4	4	4	3
4	4	3	3	3	3	3	3	3	3	3	4	3	3	2	4	4	4	3	2	2	3	3	3	5	3	3	3	3
4	3	3	2	3	4	4	3	2	2	3	2	2	3	2	3	3	3	4	4	3	4	4	3	4	3	3	3	3
4	4	3	3	3	3	3	2	3	2	4	3	3	3	2	3	3	3	3	3	3	3	3	2	5	4	3	3	2
4	3	3	3	3	4	4	4	3	3	3	4	3	3	2	4	3	2	3	3	3	3	3	3	4	4	4	4	3
4	4	3	3	2	4	4	4	3	3	3	4	3	4	3	4	4	4	3	3	3	3	2	3	4	4	3	3	3
3	3	3	3	4	4	3	3	2	2	4	3	3	3	2	3	3	3	4	4	3	3	4	3	4	4	4	3	2
4	3	3	3	3	4	3	4	3	3	4	3	3	4	3	3	3	3	3	3	3	3	2	2	4	4	4	4	3
4	3	2	2	3	4	3	3	2	2	3	2	2	3	2	2	2	1	4	3	3	4	3	3	4	4	3	3	2
4	3	2	2	3	4	3	3	3	3	3	2	2	3	2	2	2	2	4	3	3	4	3	2	4	3	3	3	2
2	2	2	2	2	4	3	4	3	3	4	3	2	3	2	2	3	2	3	2	2	4	4	4	4	4	4	3	1
2	2	2	2	2	3	3	2	2	2	3	3	2	2	1	2	2	2	3	2	2	3	3	2	3	3	2	3	2
2	2	3	2	3	4	3	4	3	2	3	2	2	3	2	2	3	2	3	2	2	3	3	3	4	3	3	4	2
4	3	2	2	2	3	3	3	2	2	4	3	2	3	1	5	5	5	3	2	2	3	3	3	4	3	4	3	2
2	2	2	2	2	3	2	2	3	2	3	3	3	3	2	5	5	3	3	3	3	3	3	3	3	3	4	3	2
2	2	3	1	3	3	4	3	3	3	3	3	2	3	2	5	5	5	2	2	3	4	4	3	3	3	4	3	2
2	3	2	2	3	4	3	3	3	2	3	2	2	2	1	2	2	2	4	3	3	4	3	3	4	3	4	3	2
2	2	2	2	2	3	4	2	3	3	2	2	2	3	2	4	3	3	3	3	3	3	3	2	3	2	2	3	1
3	3	2	2	2	4	4	3	3	2	3	3	3	3	2	2	2	3	3	3	3	3	4	3	4	3	2	3	2
2	2	2	3	3	3	3	2	2	2	3	2	2	3	2	2	2	2	3	3	3	3	3	2	3	2	3	3	2
2	2	2	2	3	4	4	4	3	3	4	3	3	3	2	2	2	2	2	2	2	2	3	4	4	3	3	3	1
2	3	2	2	2	3	3	2	2	2	3	3	3	3	2	2	2	2	3	2	2	3	3	2	3	2	2	3	1
2	2	2	3	2	3	2	3	3	2	3	3	2	3	2	3	2	3	3	3	3	3	2	3	4	3	3	3	2
3	2	3	3	2	4	3	3	3	2	2	2	2	3	2	1	2	2	4	3	3	4	3	2	4	3	2	2	2
3	3	2	2	2	4	3	3	3	2	3	3	2	2	1	2	3	2	4	3	3	4	3	3	5	4	4	3	2
2	2	2	3	3	4	3	3	3	3	3	2	3	3	2	2	2	3	4	3	3	4	3	2	5	4	4	3	2
3	2	2	2	3	3	4	3	3	2	3	3	2	3	2	2	2	2	3	3	3	3	3	3	3	4	3	2	1
4	3	2	2	2	3	3	3	3	3	3	3	2	2	1	3	2	2	2	2	3	2	3	4	3	3	3	2	2
3	2	2	2	2	3	4	3	3	2	3	3	2	2	1	3	3	3	4	3	4	4	4	3	4	3	3	3	2
3	3	2	2	3	3	3	3	4	3	3	2	3	3	2	3	2	1	4	3	4	4	3	2	3	2	3	2	2
2	2	3	2	2	3	4	4	3	3	3	3	2	3	2	2	3	2	3	2	3	3	2	2	3	2	2	3	2
2	2	2	2	2	4	4	3	3	3	3	3	3	3	2	3	3	3	2	3	2	2	4	3	4	3	3	3	2
2	3	2	2	2	3	4	4	3	3	3	3	3	2	3	2	3	3	4	3	4	4	4	3	3	3	2	3	1
2	2	2	2	2	3	3	4	2	2	3	3	3	3	2	3	3	2	3	2	2	3	3	2	3	2	3	3	2
2	2	2	2	3	4	3	4	3	3	2	2	3	2	2	3	3	2	3	2	2	3	3	2	4	3	3	3	2
2	3	2	2	2	4	3	3	3	2	2	2	3	2	2	2	3	3	2	3	2	2	3	3	4	3	3	3	1
2	2	3	2	2	2	3	2	2	2	4	3	2	2	2	2	2	2	2	2	2	2	3	2	4	3	2	2	1
1	1	1	1	1	3	3	3	3	3	3	2	3	2	2	3	3	2	3	2	2	3	3	3	3	3	3	3	2
1	1	1	1	1	5	4	4	4	3	5	4	4	3	3	3	3	2	4	4	3	5	4	4	4	4	4	3	2
1	1	1	1	1	5	4	3	3	3	5	4	3	3	3	3	3	3	4	3	3	5	4	3	4	3	3	3	2
1	1	1	1	1	5	4	3	3	3	5	4	3	3	3	3	3	2	4	2	2	5	4	3	4	3	3	3	2
1	1	1	1	1	5	5	4	4	4	5	5	4	4	4	4	4	2	4	2	2	5	5	4	5	4	4	4	3
1	2	1	1	1	5	4	3	3	3	5	4	3	3	3	3	3	2	4	3	2	5	4	3	4	3	3	3	2
1	1	1	1	1	5	5	4	3	2	5	5	4	2	2	2	2	3	4	3	3	5	5	4	5	4	3	2	2
2	1	2	1	1	4	3	2	3	3	4	3	2	3	3	3	3	2	4	3	3	4	3	2	3	2	3	3	1
1	1	1	1	1	4	3	2	3	3	4	3	2	3	3	3	3	2	4	3	3	4	3	2	3	4	3	3	2
1	1	1	2	1	4	3	2	3	2	4	3	2	3	2	3	2	3	4	3	2	4	3	2	3	2	3	2	2
1	1	1	1	1	5	5	4	4	4	5	5	4	4	4	4	4	2	4	2	3	5	5	4	5	4	4	4	2
1	2	1	1	1	5	5	4	4	4	4	3	2	3	2	3	3	2	4	2	3	5	4	3	4	3	3	3	2
1	1	1	1	1	5	4	3	3	3	4	3	2	2	2	2	2	3	4	3	2	5	5	4	5	4	3	2	2
1	1	1	1	2	5	5	4	3	2	1	1	1	1	1	3	3	2	3	3	3	4	3	2	3	2	3	3	1
1	1	1	1	1	4	3	2	3	3	1	1	1	1	1	3	3	2	3	3	3	5	5	5	3	2	3	3	2
2	1	2	1	1	4	3	2	3	3	1	1	1	1	1	3	2	3	4	3	2	5	5	5	3	2	3	2	2
1	1	1	1	1	1	1	1	1	1	1	1	1	1	1	4	4	2	4	2	2	5	5	4	5	4	4	4	2
1	1	1	2	1	1	1	1	1	1	1	1	1	1	1	3	3	3	2	3	2	5	5	5	4	3	3	3	2
